# Supplementary material for: A minimalist fluorescent MOF sensor array for Baijiu identification
Source: Royal Society of Chemistry journal article supplement (doi:10.1039/d2ay00166g), 2022-01-01
Supplement: d2ay00166g1.pdf [file d2ay00166g1.pdf]

## 1 Supplementary Material

2 Table. S1 Details of reagents.

| Regent                            | Formula                  | Manufacturers                               |
|-----------------------------------|--------------------------|---------------------------------------------|
| Pyromellitic Acid                 | $C_{10}H_6O_8$           | Macklin Reagent Co.                         |
| Zirconium tetrachloride           | $ZrCl_4$                 | Macklin Reagent Co.                         |
| Terbium(III) nitrate pentahydrate | $Tb(NO_3)_3 \cdot 5H_2O$ | Macklin Reagent Co.                         |
| Europium nitrate hexahydrate      | $Eu(NO_3)_3 \cdot 6H_2O$ | Macklin Reagent Co.                         |
| Acetone                           | $C_3H_6O$                | Macklin Reagent Co.                         |
| N, N-dimethylformamide            | $C_3H_7NO$               | Macklin Reagent Co.                         |
| Caproic acid                      | $C_6H_{12}O_2$           | Shanghai Aladdin Biochemical Technology Co. |
| Lactic acid                       | $C_3H_6O_3$              | Shanghai Aladdin Biochemical Technology Co. |
| Acetaldehyde                      | $C_2H_4O$                | Shanghai Titan Technology Co., Ltd.         |
| Acetal                            | $C_6H_{14}O_2$           | Shanghai Titan Technology Co., Ltd.         |
| Ethyl lactate                     | $C_5H_{10}O_3$           | Shanghai Aladdin Biochemical Technology Co. |
| Ethyl acetate                     | $C_4H_8O_2$              | Shanghai Titan Technology Co., Ltd.         |
| Ethyl caproate                    | $C_8H_{16}O_2$           | Shanghai Aladdin Biochemical Technology Co. |
| Isoamyl alcohol                   | $C_5H_{12}O$             | Shanghai Titan Technology Co., Ltd.         |
| N-butanol                         | $C_4H_{10}O$             | Shanghai Aladdin Biochemical Technology Co. |
| Guaiacol                          | $C_7H_8O_2$              | Shanghai Titan Technology Co., Ltd.         |
| Ferulic acid                      | $C_{10}H_{10}O_4$        | Shanghai Civi Chemical Technology Co., Ltd. |

3

Table. S2 Information of 16 kinds Baijiu.

| <b>Baijiu</b>         | <b>Flavor</b>         | <b>pH</b> | <b>Alcoholic Strength (%)</b> | <b>Mark</b> |
|-----------------------|-----------------------|-----------|-------------------------------|-------------|
| Yubingshao Jiu        | Soybean-flavour       | 4.51      | 45                            | 1           |
| Sanhua Jiu            | Rice-flavour          | 3.87      | 52                            | 2           |
| Baiyunbian Jiu        | Miscellaneous-flavour | 3.68      | 42                            | 3           |
| Dong Jiu              | Dong-flavour          | 3.69      | 54                            | 4           |
| Yanghe Daqu           | Strong-flavour        | 3.98      | 55                            | 5           |
| Jiangjing Jiu         | Light-flavour         | 4.36      | 50                            | 6           |
| Red Star Erguotou     | Light-flavour         | 4.97      | 52                            | 7           |
| Fen Jiu               | Light-flavour         | 3.53      | 53                            | 8           |
| Luzhou Laojiao        | Strong-flavour        | 3.50      | 52                            | 9           |
| Hengshui Laobaigan    | Laobaigan-flavour     | 3.92      | 67                            | 10          |
| Jingzhi Jiu           | Sesame-flavour        | 3.41      | 42                            | 11          |
| Maotai Jiu            | Moutai-flavour        | 3.71      | 53                            | 12          |
| Jiugui Jiu            | Heavy-flavour         | 3.44      | 52                            | 13          |
| Lang Jiu (Red Flower) | Miscellaneous-flavour | 3.50      | 53                            | 14          |
| Site Jiu              | Special-flavour       | 3.75      | 52                            | 15          |
| Feng Jiu              | Feng-flavour          | 3.90      | 52                            | 16          |

| <b>Equipment</b>                                   | <b>Type/Specification</b> | <b>Manufacturers</b>                    |
|----------------------------------------------------|---------------------------|-----------------------------------------|
| Electronic scales                                  | AL-204-IC                 | Mettler Toledo Instruments Co., Ltd.    |
| Fluorescence spectroscopic scanner                 | FL970                     | Shanghai Tianmei Scientific Instrument  |
| Magnetic stirring apparatus                        | RO-5-P-S25                | IKA Co.                                 |
| Ultrapure water machine                            | Milli-Q Academic          | USA Millibeu Co.                        |
| Centrifugal machine                                | TG-16W                    | Hunan Xiangyi Laboratory Instrument Co. |
| Field emission transmission<br>electron microscope | FEI Talos F200S G2        | Thermo Fisher Scientific Inc.           |

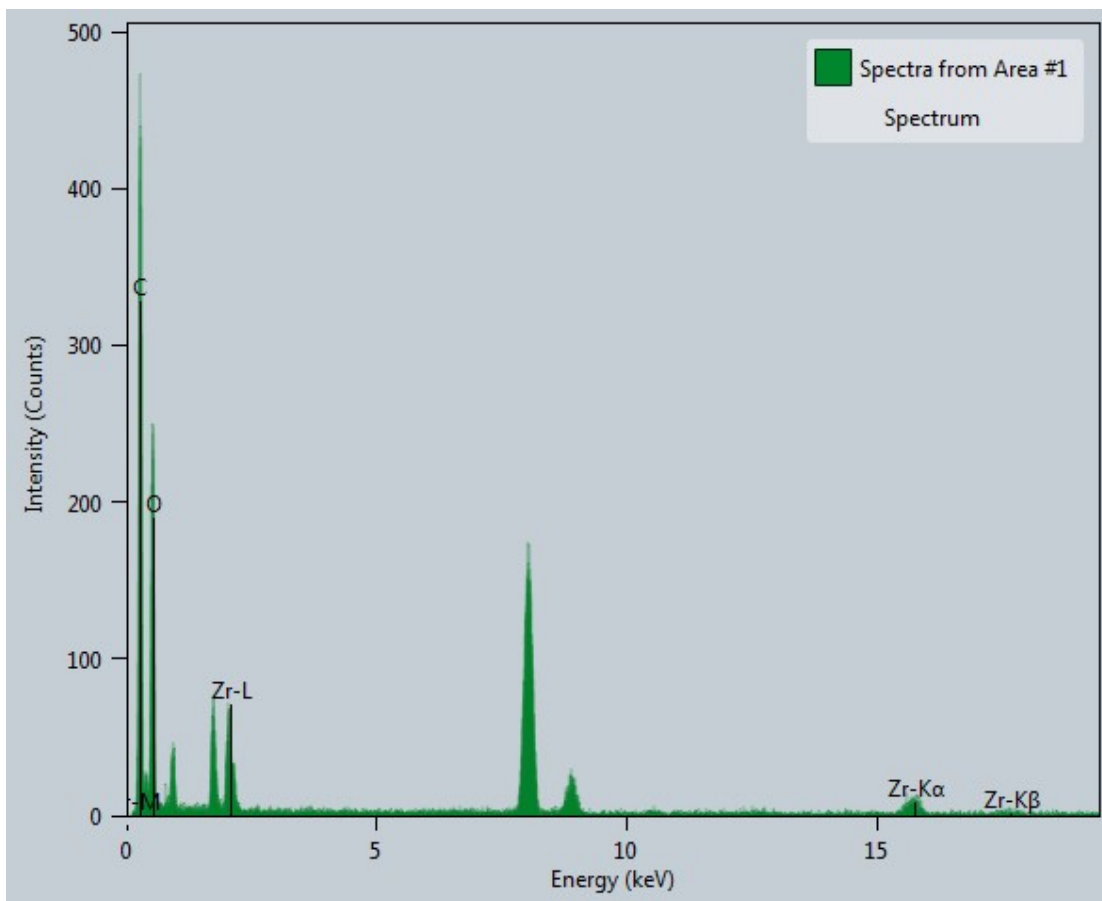

9  
10

Fig. S1 Elemental Analysis Report of UiO-66-(COOH)<sub>2</sub>.

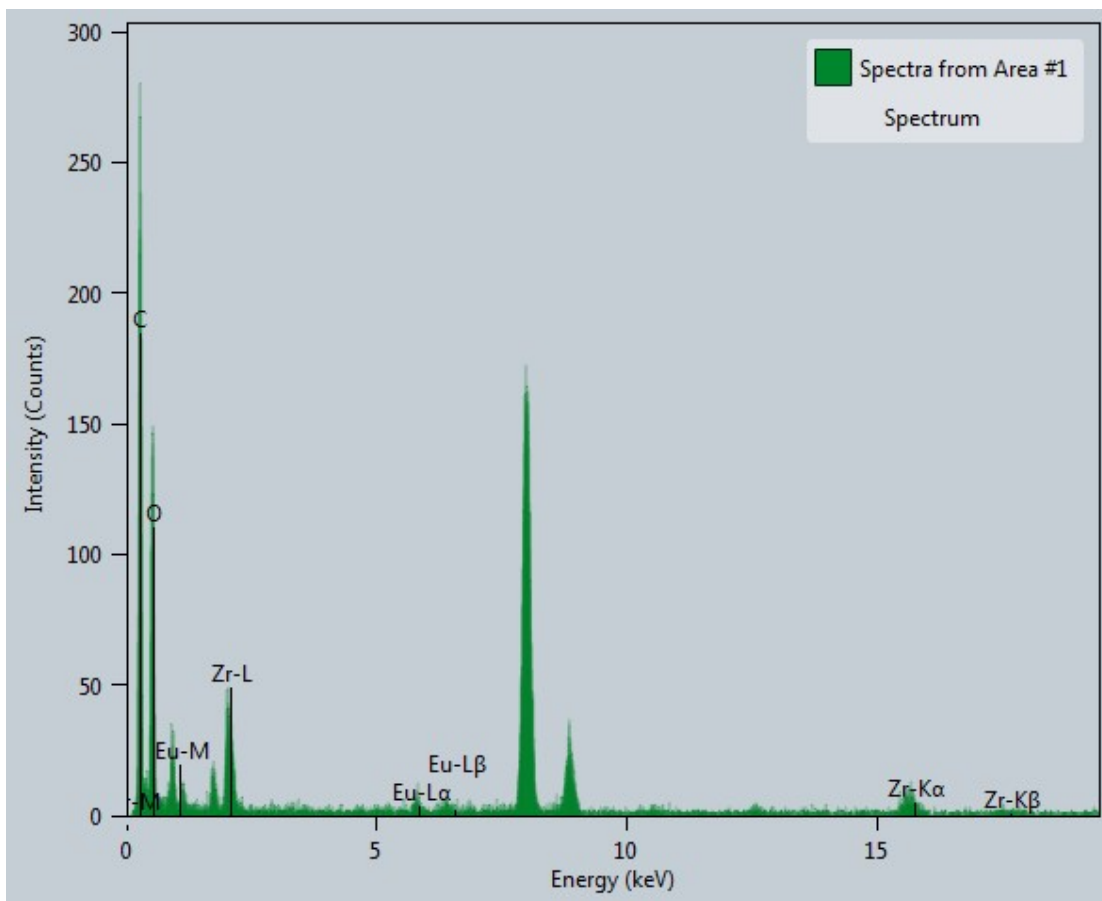

11  
12

Fig. S2 Elemental Analysis Report of Eu-MOF.

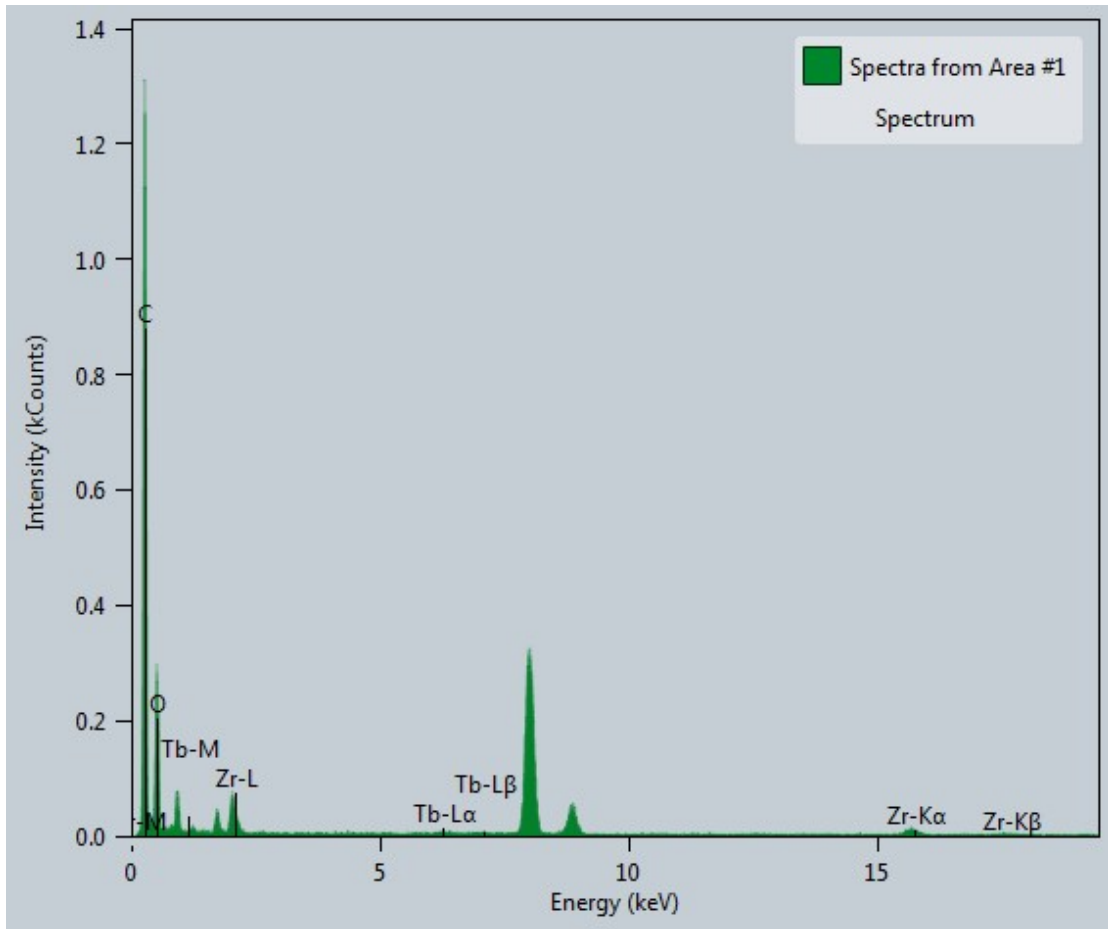

13

14

Fig. S3 Elemental Analysis Report of Tb-MOF.

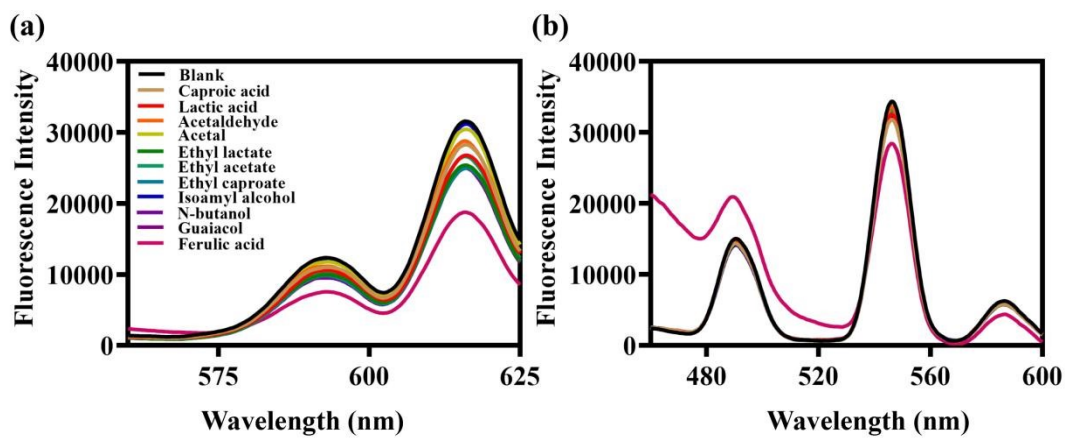

15

16 Fig. S4 Fluorescence spectra of (a) Eu-MOF and (b) Tb-MOF recognize organic molecules.

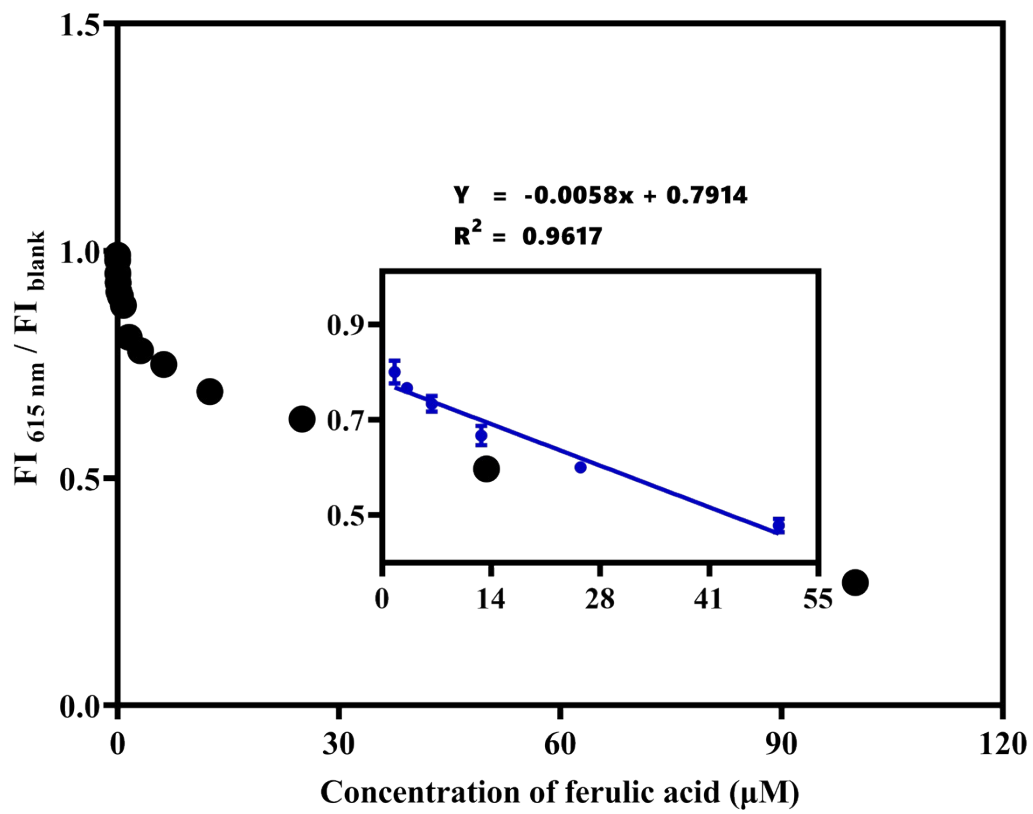

17

18

19

Fig. S5 Quantitative detection of ferulic acid by Tb-MOF.



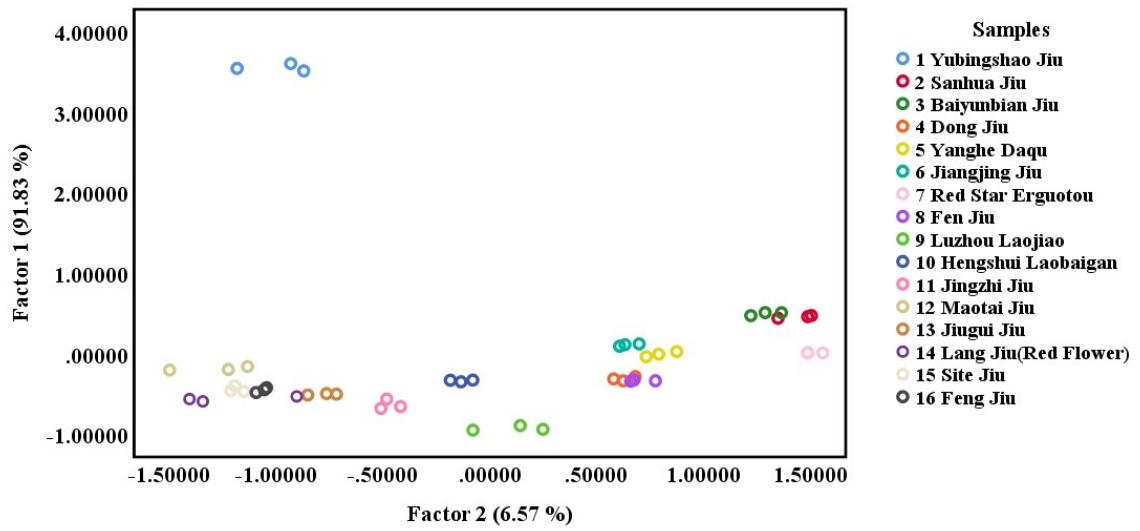

20

21

Fig. S6 Baijiu(16 different brands) were discriminated by principal component analysis.
